# Supplementary material for: Alkoxy chain regulated stimuli-responsive AIE luminogens based on tetraphenylethylene substituted phenanthroimidazoles and non-doped OLEDs with negligible efficiency roll-off
Source: Royal Society of Chemistry journal article supplement (doi:10.1039/c9tc05864h), 2020-01-01
Supplement: c9tc05864h1.pdf [file c9tc05864h1.pdf]

## Supporting Information

### **Alkoxy chain regulated stimuli responsive AIE luminogens based on tetraphenylethylene substituted phenanthroimidazole derivatives and non-doped OLEDs with negligible efficiency roll-off**

Zhipeng Qiu <sup>a</sup>, Zhiwen Yang <sup>a</sup>, Wen-Cheng Chen <sup>a</sup>, Longjiang Xing <sup>a</sup>, Shaomin Ji <sup>a,\*</sup>, Qingdan Yang <sup>a</sup>, Ning Cai <sup>a</sup>, Xinhua Ouyang <sup>b,\*</sup>, Yanping Huo <sup>a,c\*</sup>

a. School of Chemical Engineering and Light Industry, Guangdong University of Technology, Guangzhou, 510006, PR China. E-mail addresses: smji@gdut.edu.cn (Shaomin Ji), yphuo@gdut.edu.cn (Yanping Huo).

b. College of Materials Engineering, Fujian Agriculture and Forestry University, Fuzhou, 350002, PR China. E-mail addresses: tomyouyangxh@outlook.com (Xinhua Ouyang)

c. Guangdong Provincial Key Laboratory of Luminescence from Molecular Aggregates (South China University of Technology), Guangzhou 510640, China)

## 1. Synthesis and characterization

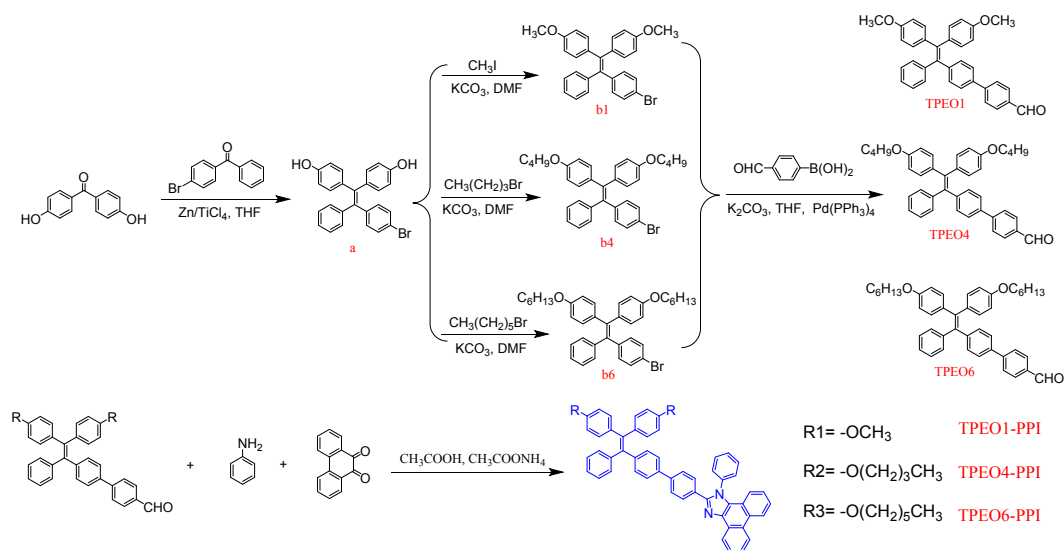

**Scheme S1.** Synthesis route of **TPEO1-PPI**, **TPEO4-PPI** and **TPEO6-PPI**.

### Synthesis of 4,4'-(2-(4-bromophenyl)-2-phenylethene-1,1-diyl) -diphenol (**a**)

Into a 250 mL dry flask 4,4'- dihydroxybenzophenone (2.57 g, 12.00 mmol), 4-bromobenzophenone (6.50 g, 25.00 mmol) and zinc dust (6.53 g, 100 mmol). Next, the flask was vacuumed and purged with nitrogen for three times. Afterward, 150 mL of dried THF was injected into the flask, followed by cooling down to  $-10\text{ }^{\circ}\text{C}$ . Then,  $\text{TiCl}_4$  (5.60 mL, 50 mmol) was added into the mixture in a dropwise way. After half an hour, the reaction was then refluxed 12 h under nitrogen conditions. After the solution cooled to room temperature, hydrochloric acid (1 M) was added to the reaction mixture to remove zinc dust. The mixture was then extracted with dichloromethane and dried with anhydrous sodium sulfate. The crude product was purified by column chromatography on silica gel (200-300 mesh) using n-hexane and ethyl acetate (6:1 v/v) as the eluant to give 3.05 g white solid (**a**) in 58 % yield.  $^1\text{H}$  NMR (400 MHz,  $\text{DMSO-d}_6$ )  $\delta$  9.36 (d,  $J = 17.4$  Hz, 1H), 7.31 (d,  $J = 8.4$  Hz, 1H), 7.11 (dq,  $J = 14.5, 7.1$  Hz, 2H), 6.93 (d,  $J = 6.9$  Hz, 1H), 6.85 (d,  $J = 8.4$  Hz, 1H), 6.74 (t,  $J = 8.2$  Hz, 2H), 6.51 (dd,  $J = 18.4, 8.5$  Hz, 2H).  $^{13}\text{C}$  NMR (101 MHz,  $\text{DMSO-d}_6$ )  $\delta$  156.6, 156.5, 144.2, 144.0, 141.8, 136.9, 134.3, 134.2, 133.4, 132.5, 132.5, 131.2, 131.2, 128.4, 126.7, 119.5, 115.2, 115.0. HR-MS  $m/z$  calcd for  $\text{C}_{26}\text{H}_{19}\text{BrO}_2$  ( $[\text{M}+\text{H}]^+$ ): 443.06412; found: 443.06423.

### Synthesis of 4,4'-(2-(4-Bromophenyl)-2-phenylethene-1,1-diyl) bis-((methoxyl) benzene) (**b1**)

Iodomethane (1.28 g, 9.04 mmol) was added to DMF (40 mL), containing (**a**) (1 g, 2.26 mmol) and K<sub>2</sub>CO<sub>3</sub> (1.60 g, 11.30 mmol). Then, the reaction was stirred 15 h under nitrogen conditions at 70 °C. After the mixture cooled to room temperature, it was extracted with dichlormethane, washed with deionized water several times and dried with anhydrous magnesium sulfate. The crude product was purified by column chromatography on silica gel (200-300 mesh) using n-hexane and dichlormethane (10:1 v/v) as the eluant to give 0.9 g pale yellow viscous oil (**b1**) in 85 % yield. <sup>1</sup>H NMR (400 MHz, CDCl<sub>3</sub>) δ 7.29 – 7.19 (m, 2H), 7.10 (d, *J* = 6.6 Hz, 1H), 7.01 (t, *J* = 7.8 Hz, 1H), 6.95 – 6.85 (m, 2H), 6.64 (dd, *J* = 14.2, 8.7 Hz, 1H), 3.80 – 3.65 (m, 2H).

#### **Synthesis of 4,4-(2-(4-Bromophenyl)-2-phenylethene-1,1-diyl) bis-((butoxy) benzene) (**b4**)**

1-bromobutane (1.51 g, 9.04 mmol) was added to DMF (40 mL), containing (**a**) (1 g, 2.26 mmol) and K<sub>2</sub>CO<sub>3</sub> (1.60 g, 11.30 mmol). Then, the reaction was stirred 15 h under nitrogen conditions at 70 °C. After the mixture cooled to room temperature, it was extracted with dichlormethane, washed with deionized water several times and dried with anhydrous magnesium sulfate. The crude product was purified by column chromatography on silica gel (200-300 mesh) using n-hexane and dichlormethane (10:1 v/v) as the eluant to give 1.10 g pale yellow viscous oil (**b4**) in 88 % yield. <sup>1</sup>H NMR (400 MHz, CDCl<sub>3</sub>) δ 7.21 (d, *J* = 8.4 Hz, 2H), 7.10 (q, *J* = 6.4 Hz, 3H), 7.00 (dd, *J* = 7.5, 1.7 Hz, 2H), 6.90 (ddd, *J* = 11.2, 7.0, 3.8 Hz, 6H), 6.63 (dd, *J* = 14.3, 8.7 Hz, 4H), 3.96 – 3.83 (m, 4H), 1.79 – 1.67 (m, 4H), 1.47 (dp, *J* = 14.9, 7.6 Hz, 4H), 0.96 (q, *J* = 7.3 Hz, 6H).

#### **Synthesis of 4,4-(2-(4-Bromophenyl)-2-phenylethene-1,1-diyl) bis-((hexyloxy) benzene) (**b6**)**

1-bromohexane (1.44 g, 9.04 mmol) was added to DMF (50 mL), containing (**a**) (1 g, 2.26 mmol) and K<sub>2</sub>CO<sub>3</sub> (1.60 g, 11.30 mmol). Then, the reaction was stirred 15 h under nitrogen conditions at 70 °C. After the mixture cooled to room temperature, it was extracted with dichlormethane, washed with deionized water several times and dried with anhydrous magnesium sulfate. The crude product was purified by column chromatography on silica gel (200-300 mesh) using n-hexane and dichlormethane (10:1 v/v) as the eluant to give 1.27 g pale yellow viscous oil (**b6**) in 92 % yield. <sup>1</sup>H NMR (400 MHz, CDCl<sub>3</sub>) δ 7.21 (d, *J* = 8.4 Hz, 2H), 7.09 (t, *J* = 6.5 Hz, 3H), 7.03-6.96 (m, 2H), 6.94-6.84 (m, 6H), 6.62 (dd, *J* = 14.3, 8.7 Hz, 4H), 3.87 (dt, *J* = 11.5, 6.6 Hz, 4H), 1.75 (dd, *J* = 15.4, 4H), 1.48 – 1.20 (m, 12H), 0.90 (q, *J* = 6.7 Hz, 6H). <sup>13</sup>C NMR (101 MHz, CDCl<sub>3</sub>) δ 157.9, 157.8, 143.9, 143.4, 141.0, 137.7, 135.8, 135.8, 133.1, 132.6, 132.5, 131.4, 130.8, 127.8, 126.2, 120.0, 113.7, 113.6, 67.9, 67.8, 31.6, 31.6, 29.3, 25.8, 25.8, 22.6, 14.1. HR-MS *m/z*

calcd for  $C_{38}H_{43}BrO_2$  ( $[M+H]^+$ ): 611.25192; found: 611.25176.

**Synthesis of 4'-(1-Phenyl-2,2-bis(4-(methoxy)phenyl)vinyl)-[1,1'-biphenyl]-4-carbaldehyde (TPEO1).**

The product (**b1**) of the last step (0.94 g, 2.00 mmol) was added to mixture of THF (40 mL) and water (10 mL) solution, containing 4-formylphenylboronic acid (0.50 g, 3.50 mmol). The mixture was stirred at room temperature for 30 min and then  $K_2CO_3$  (1.52 g, 11.00 mmol) and  $Pd(PPh_3)_4$  (0.12 g, 0.10 mmol) were added to the mixture, followed by refluxing overnight under nitrogen conditions. After the mixture cooled down to room temperature, it was extracted with dichlormethane, washed with distilled water several times and dried with anhydrous magnesium sulfate. The crude product was purified by column chromatography on silica gel (200-300 mesh) using hexane and dichlormethane (5:1 v/v) as the eluant to give 0.75 g yellow viscous solid (**TPEO1**) in 76% yield.  $^1H$  NMR (400 MHz,  $CDCl_3$ )  $\delta$  10.03 (s, 1H), 7.91 (d,  $J$  = 8.0 Hz, 2H), 7.72 (d,  $J$  = 8.0 Hz, 2H), 7.41 (d,  $J$  = 8.0 Hz, 2H), 7.19 – 7.01 (m, 7H), 6.97 (dd,  $J$  = 14.7, 8.5 Hz, 4H), 6.65 (t,  $J$  = 8.4 Hz, 4H), 3.75 (s, 6H).

**Synthesis of 4'-(1-Phenyl-2,2-bis(4-(butoxy)phenyl)vinyl)-[1,1'-biphenyl]-4-carbaldehyde (TPEO4).**

The synthetic process is similar with **TPEO1** to yield a yellow powder (**TPEO4**) in 78% yield.  $^1H$  NMR (400 MHz,  $CDCl_3$ )  $\delta$  10.01 (s, 1H), 7.90 (d,  $J$  = 15.9 Hz, 2H), 7.72 (d,  $J$  = 8.3 Hz, 2H), 7.40 (d,  $J$  = 8.4 Hz, 2H), 7.12 (dd,  $J$  = 10.9, 4.0 Hz, 4H), 7.05 (dd,  $J$  = 7.7, 1.7 Hz, 2H), 6.94 (dd,  $J$  = 14.6, 8.8 Hz, 4H), 6.63 (t,  $J$  = 8.5 Hz, 4H), 3.88 (t,  $J$  = 6.5 Hz, 3H), 1.76 – 1.68 (m, 3H), 1.46 (dq,  $J$  = 14.8, 7.4, 2.1 Hz, 4H), 0.95 (td,  $J$  = 7.4, 3.4 Hz, 5H).

**Synthesis of 4'-(1-Phenyl-2,2-bis(4-(hexyloxy)phenyl)vinyl)-[1,1'-biphenyl]-4-carbaldehyde (TPEO6).**

The synthetic process is similar with **TPEO1** to yield a yellow powder (**TPEO6**) in 75% yield.  $^1H$  NMR (400 MHz,  $CDCl_3$ )  $\delta$  10.03 (s, 1H), 7.91 (d,  $J$  = 8.3 Hz, 2H), 7.72 (d,  $J$  = 8.2 Hz, 2H), 7.40 (d,  $J$  = 8.3 Hz, 2H), 7.16 – 7.08 (m, 5H), 7.06 (dd,  $J$  = 7.6, 5.7 Hz, 2H), 6.95 (dt,  $J$  = 11.8, 8.2 Hz, 4H), 6.63 (t,  $J$  = 8.5 Hz, 4H), 3.87 (t,  $J$  = 6.5 Hz, 4H), 1.78 – 1.66 (m, 4H), 1.49 – 1.23 (m, 12H), 0.89 (q,  $J$  = 6.7 Hz, 6H).  $^{13}C$  NMR (101 MHz,  $CDCl_3$ )  $\delta$  192.0, 157.9, 157.8, 146.8, 145.0, 144.2, 141.1, 138.2, 136.8, 136.0, 135.0, 132.6, 132.6, 132.1, 131.5, 130.2, 127.8, 127.3, 126.5, 126.2,

113.7, 113.6, 67.9, 31.6, 29.3, 25.8, 22.6, 14.0. HR-MS  $m/z$  calcd for  $C_{45}H_{48}O_3$  ( $[M+H]^+$ ): 637.36762; found: 637.36751.

### Synthesis of TPEO1-PPI

**TPEO1** (0.99 g, 2.00 mmol), 9,10-phenanthrenequinone (0.42 g, 2.00 mmol), aniline (0.93 g, 10.00 mmol), and ammonium acetate (0.62 g, 8.00 mmol) were refluxed in 20 ml acetic acid solution under an argon atmosphere for 2 h. After cooling to room temperature, a brown mixture was obtained and poured into methanol under stirring. The raw product was separated by filtration and washed with methanol, and then dried under vacuum. The crude product was purified by column chromatography on silica gel (200-300 mesh) using dichloromethane as the eluant to give 1.10 g yellow solid with a 73 % yield.  $^1H$  NMR (600 MHz,  $CDCl_3$ )  $\delta$  8.94 (s, 1H), 8.77 (d,  $J$  = 8.3 Hz, 1H), 8.71 (d,  $J$  = 8.4 Hz, 1H), 7.76 (t,  $J$  = 7.4 Hz, 1H), 7.70 – 7.59 (m, 6H), 7.57 – 7.47 (m, 5H), 7.34 (d,  $J$  = 8.3 Hz, 2H), 7.27 (d,  $J$  = 7.3 Hz, 1H), 7.18 (d,  $J$  = 7.8 Hz, 1H), 7.15 – 7.02 (m, 7H), 6.96 (dd,  $J$  = 19.3, 8.8 Hz, 4H), 6.64 (dd,  $J$  = 10.5, 8.8 Hz, 4H), 3.74 (d,  $J$  = 4.8 Hz, 6H).  $^{13}C$  NMR (101 MHz,  $CDCl_3$ )  $\delta$  158.19, 150.61, 144.20, 143.86, 140.91, 140.46, 138.80, 138.68, 137.41, 136.32, 132.60, 131.87, 131.45, 130.20, 129.68, 129.58, 129.15, 128.25, 127.74, 127.31, 126.47, 126.28, 126.13, 125.67, 124.91, 124.12, 123.06, 122.86, 120.87, 113.07, 55.09. HR-MS  $m/z$  calcd for  $C_{55}H_{40}N_2O_2$  ( $[M+H]^+$ ): 761.31; found: 761.289.

### Synthesis of TPEO4-PPI

The synthetic process is similar with **TPEO1-PPI** to yield a yellow powder (77%).  $^1H$  NMR (400 MHz,  $CDCl_3$ )  $\delta$  8.93 (s, 1H), 8.77 (d,  $J$  = 8.3 Hz, 1H), 8.71 (d,  $J$  = 8.3 Hz, 1H), 7.75 (t,  $J$  = 7.4 Hz, 1H), 7.65 (dd,  $J$  = 19.8, 7.7 Hz, 6H), 7.52 (dd,  $J$  = 17.9, 7.6 Hz, 5H), 7.34 (d,  $J$  = 8.1 Hz, 2H), 7.27 (d,  $J$  = 11.5 Hz, 2H), 7.18 (d,  $J$  = 8.2 Hz, 1H), 7.14 – 7.01 (m, 7H), 6.94 (dd,  $J$  = 12.8, 8.6 Hz, 4H), 6.63 (t,  $J$  = 7.6 Hz, 4H), 3.88 (td,  $J$  = 6.3, 2.9 Hz, 4H), 1.76 – 1.68 (m, 4H), 1.46 (dd,  $J$  = 14.7, 7.4 Hz, 4H), 0.95 (t,  $J$  = 7.4 Hz, 6H).  $^{13}C$  NMR (101 MHz,  $CDCl_3$ )  $\delta$  157.76, 150.65, 144.30, 143.97, 140.92, 140.65, 138.83, 138.45, 137.35, 136.13, 132.60, 131.89, 131.47, 130.20, 129.66, 129.57, 129.16, 128.25, 127.72, 127.23, 126.46, 126.27, 126.09, 125.64, 124.89, 124.12, 123.07, 122.84, 120.87, 113.60, 67.52, 31.40, 19.27, 13.90. HR-MS  $m/z$  calcd for  $C_{61}H_{52}N_2O_2$  ( $[M+H]^+$ ): 845.40; found: 845.489.

### Synthesis of TPEO6-PPI

The synthetic process is similar with **TPEO1-PPI** to yield a yellow powder (80%).  $^1H$  NMR

(600 MHz, CDCl<sub>3</sub>) δ 8.90 (s, 1H), 8.77 (d, *J* = 8.4 Hz, 1H), 8.71 (d, *J* = 8.3 Hz, 1H), 7.75 (t, *J* = 7.4 Hz, 1H), 7.63 (dt, *J* = 13.4, 6.9 Hz, 6H), 7.57 – 7.46 (m, 5H), 7.34 (d, *J* = 8.2 Hz, 2H), 7.29 – 7.24 (m, 1H), 7.19 (d, *J* = 8.2 Hz, 1H), 7.13 – 7.02 (m, 7H), 6.94 (dd, *J* = 20.2, 8.6 Hz, 4H), 6.66 – 6.59 (m, 4H), 3.87 (dd, *J* = 10.9, 6.5 Hz, 4H), 1.78 – 1.67 (m, 4H), 1.48 – 1.39 (m, 4H), 1.38 – 1.29 (m, 8H), 0.90 (t, *J* = 6.5 Hz, 6H). <sup>13</sup>C NMR (101 MHz, CDCl<sub>3</sub>) δ 157.74, 150.65, 144.31, 143.99, 140.96, 140.64, 138.73, 138.42, 137.27, 136.12, 132.61, 131.90, 131.48, 130.22, 129.70, 129.59, 129.15, 128.24, 127.73, 127.20, 126.47, 126.30, 126.09, 125.70, 124.95, 124.13, 123.05, 122.85, 120.88, 113.58, 67.84, 31.64, 29.30, 25.76, 22.62, 14.07. HR-MS *m/z* calcd for C<sub>65</sub>H<sub>60</sub>N<sub>2</sub>O<sub>2</sub> ([M+H]<sup>+</sup>): 901.47; found: 901.508

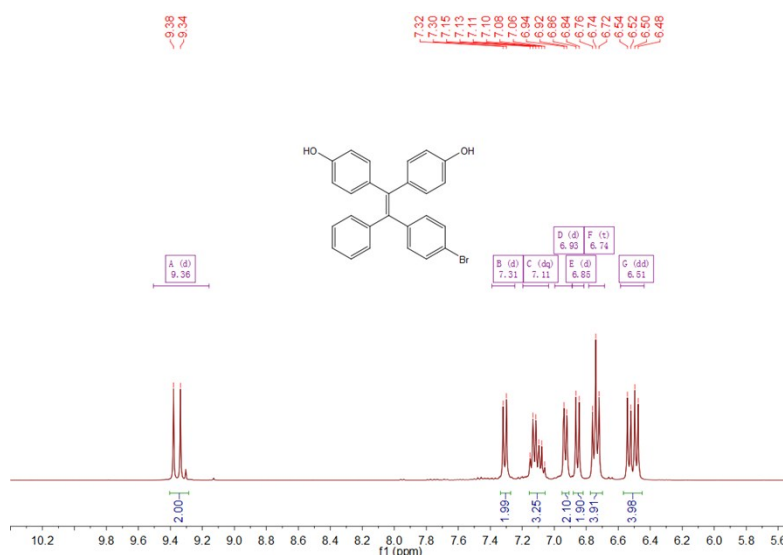

**Fig. S1.** <sup>1</sup>H-NMR spectrum of **a**

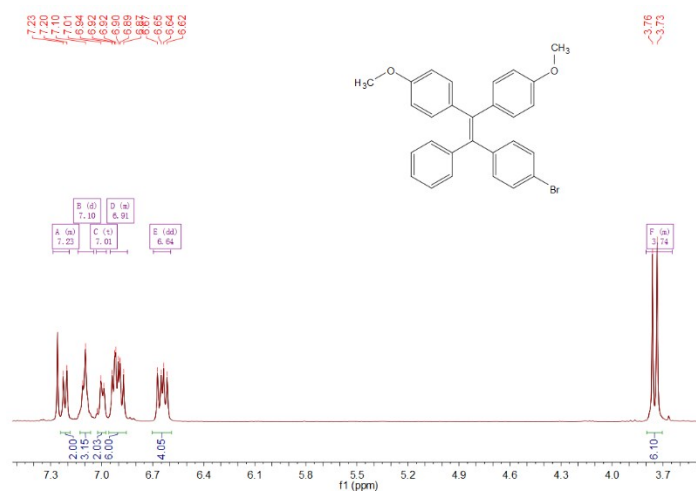

**Fig. S2.** <sup>1</sup>H-NMR spectrum of **b1**



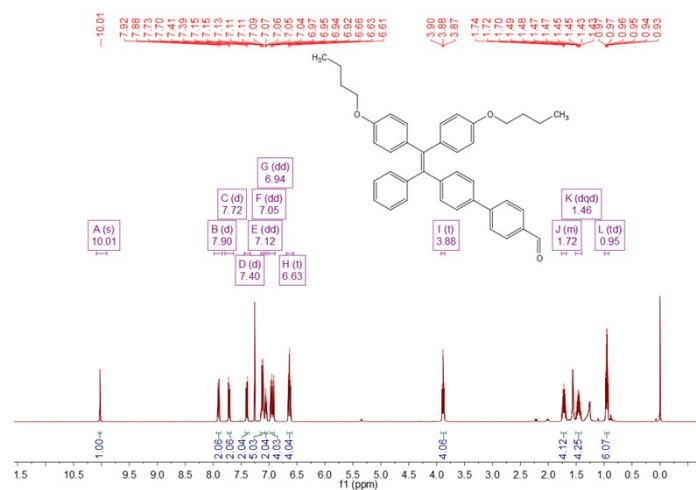

Fig. S6.  $^1\text{H}$ -NMR spectrum of TPEO4

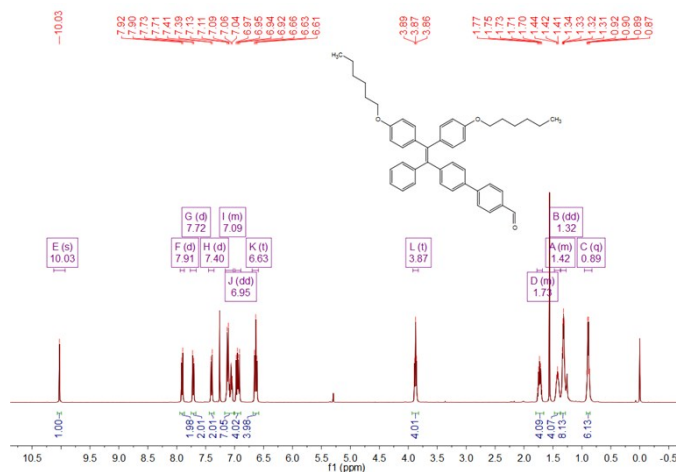

Fig. S7.  $^1\text{H}$ -NMR spectrum of TPEO6

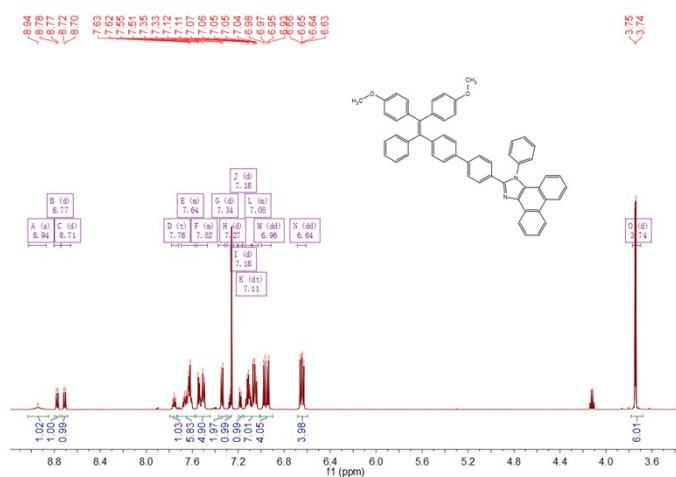

Fig. S8.  $^1\text{H}$ -NMR spectrum of TPEO1-PPI



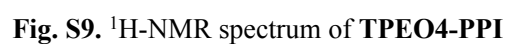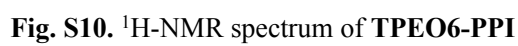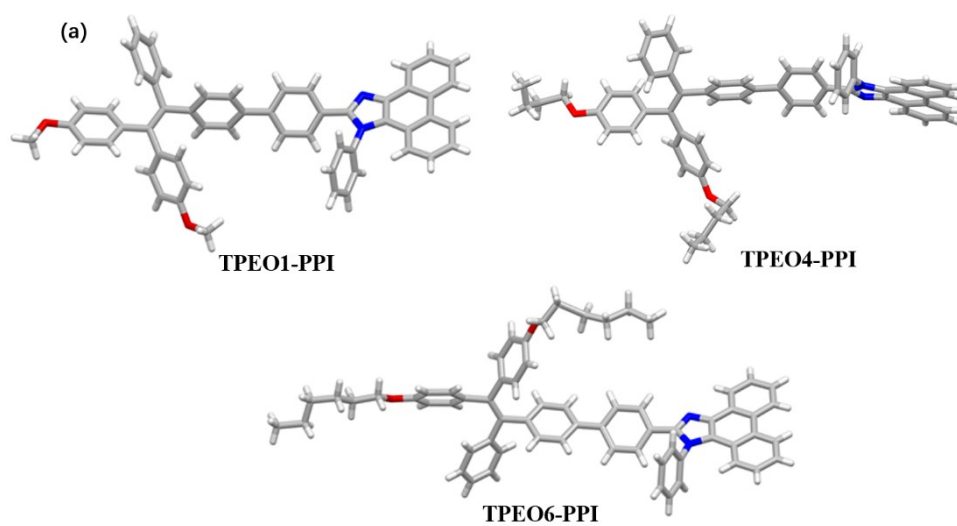

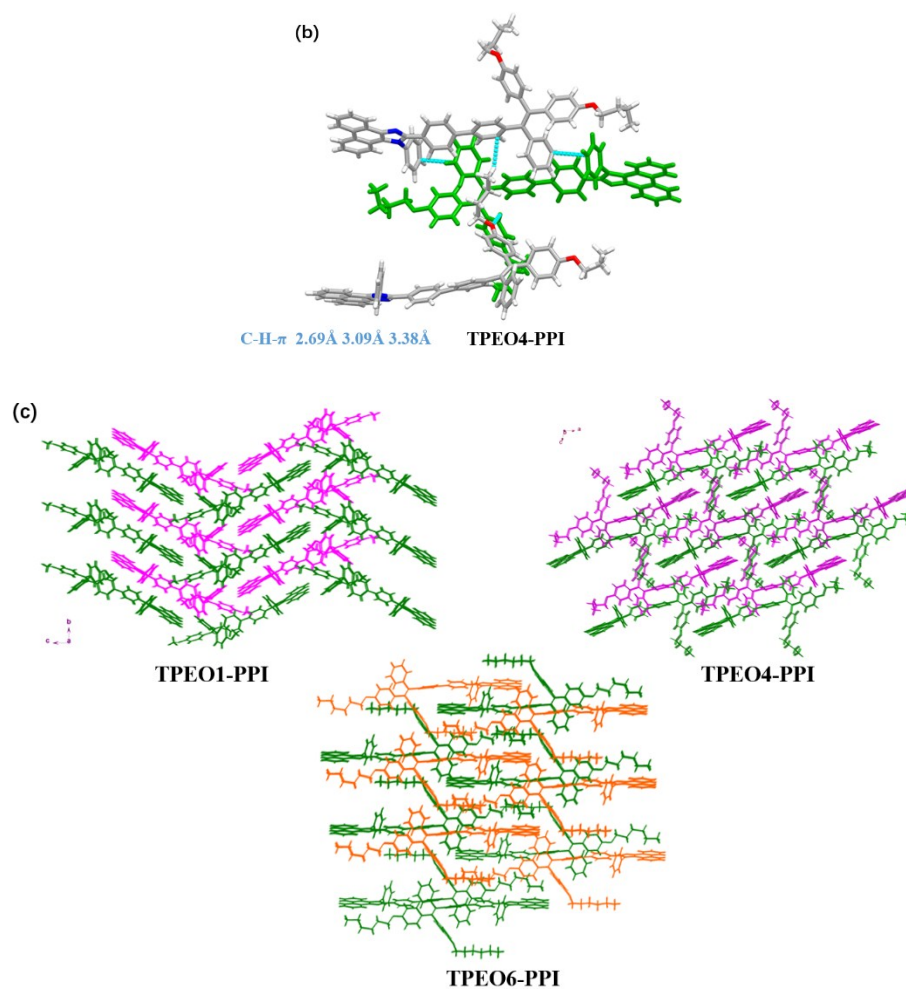

**Fig. S11.** Single crystal (a) and molecular packing(c) of TPEO1-PPI, TPEO4-PPI and TPEO6-PPI.

## 2. Photophysical properties

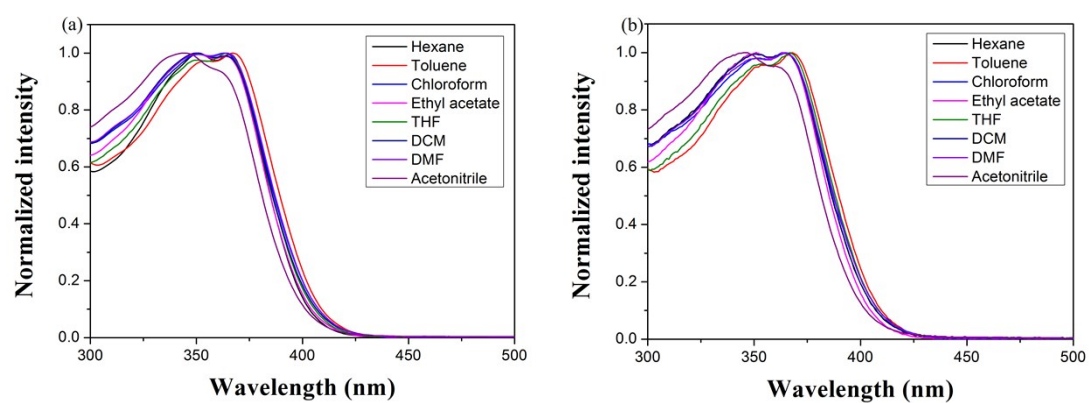

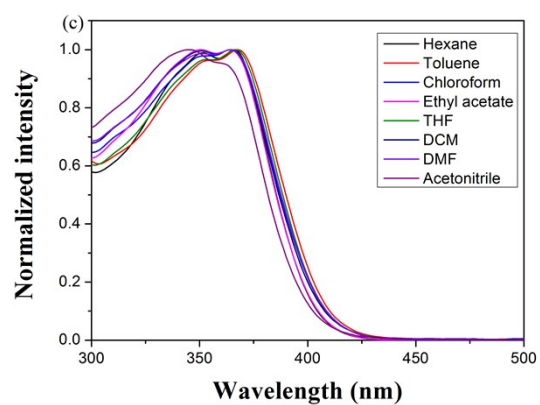

**Fig. S12.** UV-vis absorption of (a) TPEO1-PPI, (b) TPEO4-PPI, (c) TPEO6-PPI in different solution.

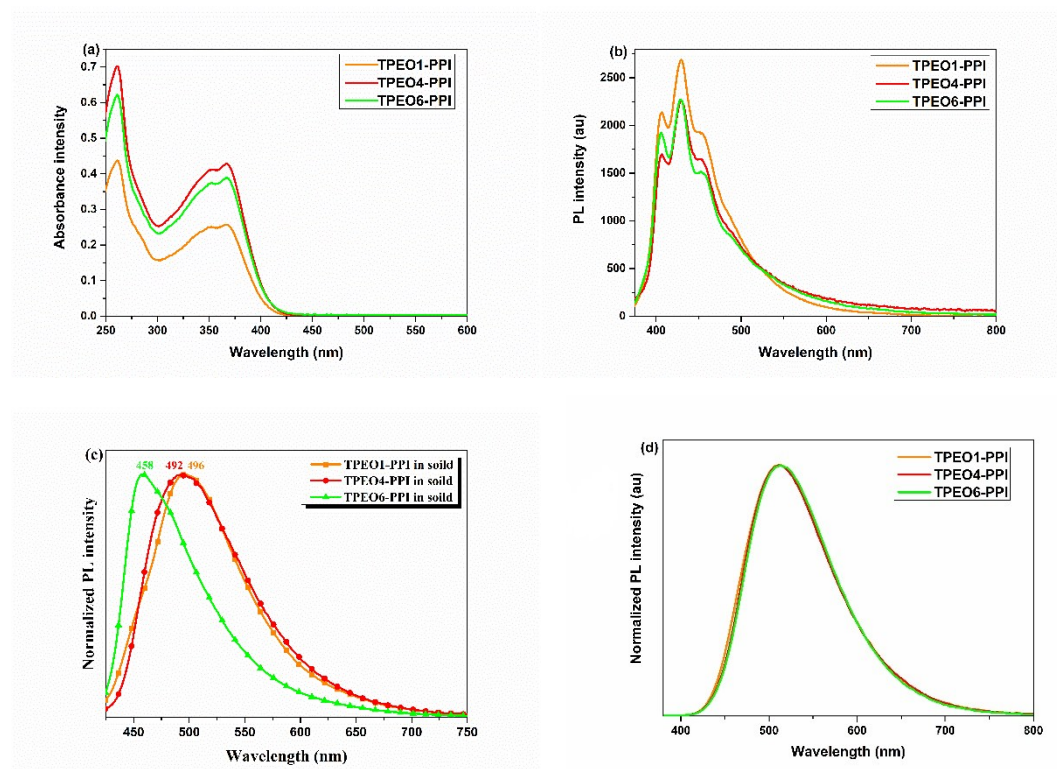

**Fig. S13.** UV-vis absorption (a) and fluorescence spectra of TPEO1-PPI, TPEO4-PPI and TPEO6-PPI in (b)THF solution, (c) solid powder and (d) neat films.

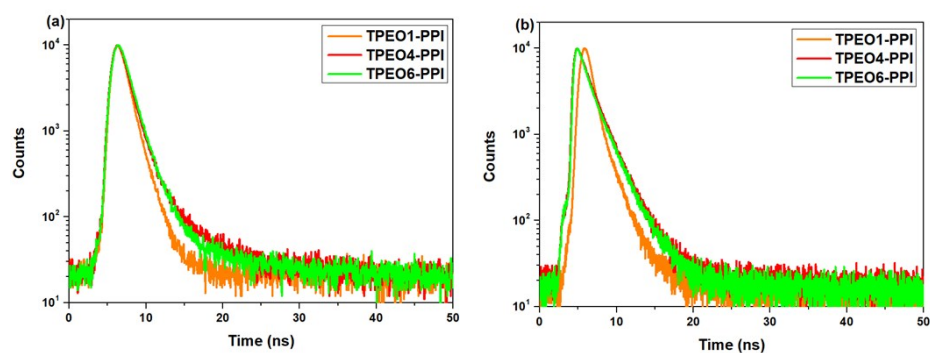

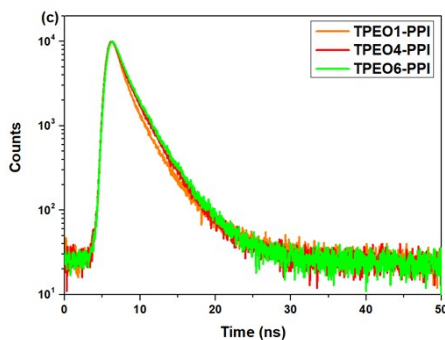

**Fig. S14.** Fluorescence decay curves of the **TPEO1-PPI**, **TPEO4-PPI**, **TPEO6-PPI** in (a) THF solutions ( $10^{-5}$  M), (b) solid powder and (c) solid films.

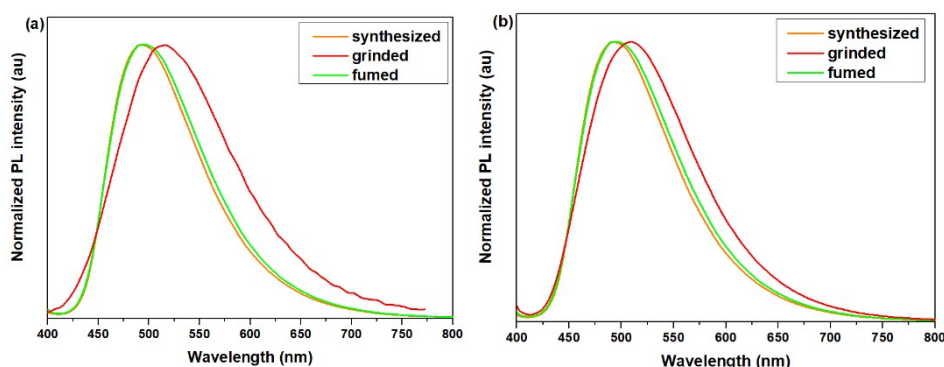

**Fig. S15.** Normalized fluorescent spectra of **TPEO1-PPI** (a), **TPEO4-PPI** (b) in different solid-states: synthesized, grinded and re-steamed ( $\lambda_{\text{ex}}=365$  nm)

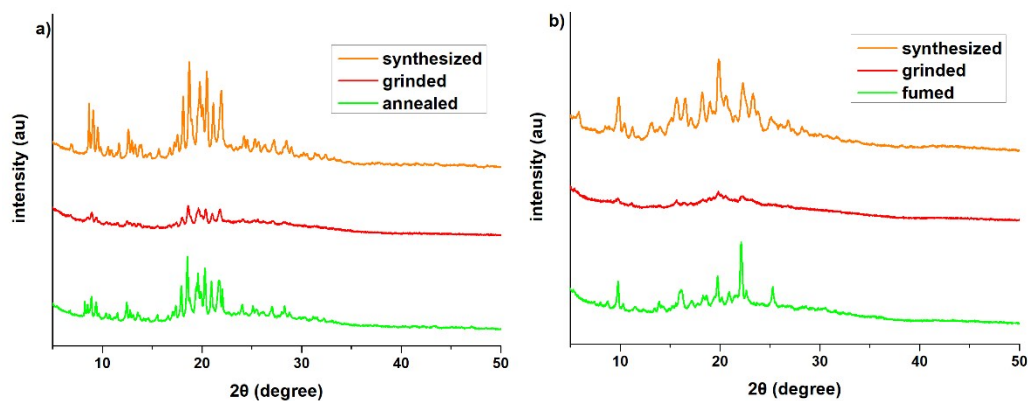

**Fig. S16.** XRD patterns of **TPEO1-PPI** a) and **TPEO4-PPI** b) in different solid-states: synthesized, grinded and fumed.

**Table S1.** Peak Emission Wavelengths of **TPEO1-PPI**, **TPEO4-PPI** and **TPEO6-PPI** under Various External Stimuli.

| Compound         | $\lambda_{\text{synthesized}}$ (nm) | $\lambda_{\text{grinded}}$ (nm) | $\lambda_{\text{fumed}}$ (nm) |
|------------------|-------------------------------------|---------------------------------|-------------------------------|
| <b>TPEO1-PPI</b> | 496                                 | 511                             | 498                           |
| <b>TPEO4-PPI</b> | 492                                 | 512                             | 495                           |
| <b>TPEO6-PPI</b> | 459                                 | 512                             | 462                           |

## 5. Electrochemical measurements

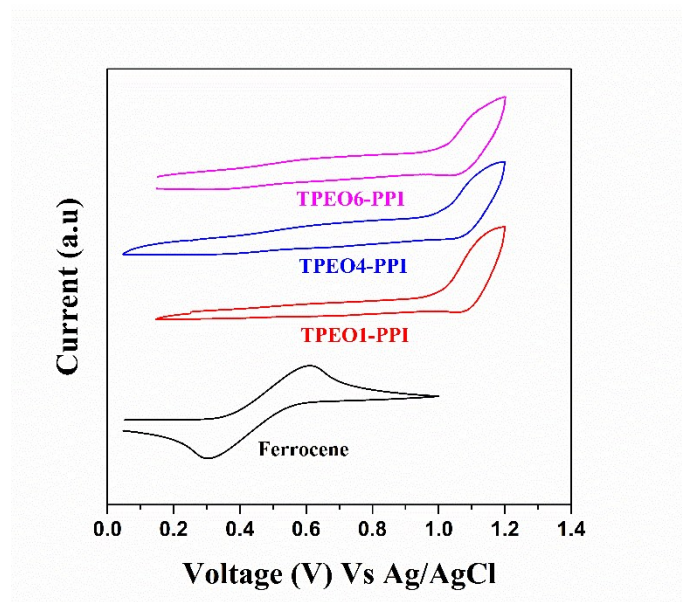

**Fig. S17.** Cyclic voltammetry curves of TPEO1-PPI, TPEO4-PPI, TPEO6-PPI in THF.

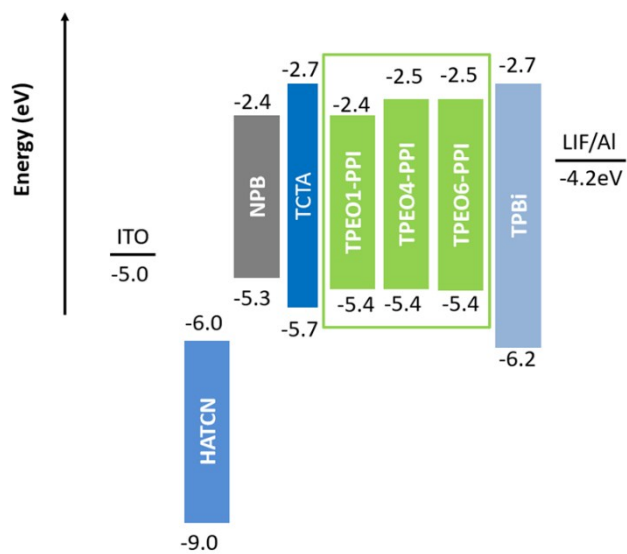

**Fig. S18.** Schematic diagram of material level and structure of the device.
